# Supplementary material for: Exploring the relationship between warm season precipitation, potential evaporation, and apparent potential evaporation at site scale
Source: Copernicus journal article supplement (doi:10.5194/hess-2018-186), 2018-04-17
Supplement: Supplementary file 1 [file hess-2018-186-supplement.pdf]

## Supplement

Table S1. Weather station information. “Period” is the recorded period of each year. “Month” is the number of months with available data of each year. “Year” is the number of recorded years. The “r” value is the Pearson correlation coefficient between annual precipitation and annual “apparent” potential evaporation.

| State or region | Station                | Period  | Month | Year | Latitude | Longitude | r     |
|-----------------|------------------------|---------|-------|------|----------|-----------|-------|
| Alabama         | Huntsville Wso Ap      | Mar-Sep | 7     | 6    | 34°39'   | -86°46'   | -0.73 |
| Alabama         | Winfield 2 SW          | Apr-Oct | 7     | 21   | 33°55'   | -87°51'   | -0.35 |
| Alabama         | Auburn Agronomy Farm   | Mar-Nov | 9     | 8    | 32°36'   | -85°30'   | -0.64 |
| Alabama         | Demopolis Lock and Dam | Mar-Nov | 9     | 20   | 32°31'   | -87°50'   | -0.24 |
| Alabama         | Milstead               | Apr-Nov | 8     | 4    | 32°27'   | -85°53'   | -0.95 |
| Alabama         | Headland               | Feb-Nov | 10    | 23   | 31°21'   | -85°20'   | -0.28 |
| Alabama         | Fairhope 2 NE          | Jan-Dec | 12    | 28   | 30°33'   | -87°53'   | -0.54 |
| Alabama         | Camp Hill 2 NW         | Mar-Oct | 8     | 11   | 32°50'   | -85°39'   | -0.70 |
| Alabama         | Cullman Nahs           | May-Sep | 5     | 5    | 34°11'   | -86°48'   | 0.05  |
| Arizona         | Roosevelt 1 WNW        | Jan-Dec | 12    | 28   | 33°40'   | -111°9'   | -0.78 |
| Arizona         | San Carlos Reservoir   | Jan-Dec | 12    | 15   | 33°11'   | -110°32'  | -0.43 |
| Arizona         | Bartlett DAM           | Jan-Dec | 12    | 17   | 33°49'   | -111°39'  | -0.61 |
| Arizona         | Tempe ASU              | Jan-Dec | 12    | 4    | 33°26'   | -111°55'  | -0.88 |
| Arizona         | Safford Agricultrl CTR | Jan-Dec | 12    | 15   | 32°49'   | -109°41'  | -0.76 |
| Arkansas        | Keiser                 | Apr-Oct | 7     | 30   | 35°40'   | -90°5'    | -0.17 |
| Arkansas        | Blue Mountain Dam      | Mar-Nov | 9     | 28   | 35°7'    | -93°39'   | -0.38 |
| Arkansas        | Blakely Mountain Dam   | Mar-Nov | 9     | 24   | 34°34'   | -93°12'   | -0.18 |
| Arkansas        | Hope 3 NE              | Apr-Oct | 7     | 22   | 33°43'   | -93°33'   | -0.54 |
| California      | Trinity River Hatch    | Jan-Dec | 12    | 13   | 40°43'   | -122°48'  | -0.25 |

|                   |                        |         |    |    |        |          |       |
|-------------------|------------------------|---------|----|----|--------|----------|-------|
| <b>California</b> | Chico Univ Farm        | Jan-Dec | 12 | 12 | 39°42' | -121°49' | -0.81 |
| <b>California</b> | Boca                   | Jun-Sep | 4  | 13 | 39°23' | -120°6'  | -0.29 |
| <b>California</b> | Friant Gov Camp        | Jan-Dec | 12 | 22 | 36°59' | -119°43' | -0.32 |
| <b>California</b> | Cachuma Lake           | Jan-Dec | 12 | 28 | 34°35' | -119°59' | -0.60 |
| <b>Colorado</b>   | Springfield 7 WSW      | Apr-Oct | 7  | 14 | 37°22' | -102°45' | -0.14 |
| <b>Colorado</b>   | Grand Junction 6 ESE   | May-Sep | 5  | 23 | 39°3'  | -108°27' | -0.61 |
| <b>Colorado</b>   | Akron4 E               | Apr-Oct | 7  | 24 | 40°9'  | -103°9'  | -0.78 |
| <b>Colorado</b>   | FT Collins             | Apr-Oct | 7  | 32 | 40°35' | -105°5'  | -0.72 |
| <b>Colorado</b>   | Alamosa WSO AP         | Jun-Sep | 4  | 16 | 37°27' | -105°52' | -0.16 |
| <b>Florida</b>    | Milton EXP STN         | Jan-Dec | 12 | 12 | 30°47' | -87°8'   | -0.45 |
| <b>Florida</b>    | Gainesville 3 WSW      | Jan-Dec | 12 | 16 | 29°38' | -82°22'  | -0.24 |
| <b>Florida</b>    | Lisbon                 | Jan-Dec | 12 | 22 | 28°52' | -81°47'  | -0.31 |
| <b>Florida</b>    | FT Pierce ARC          | Mar-Sep | 7  | 5  | 27°26' | -80°24'  | -0.93 |
| <b>Florida</b>    | Lake Alfred EXP STN    | Jan-Dec | 12 | 15 | 28°6'  | -81°43'  | -0.45 |
| <b>Florida</b>    | Moore Haven Lock 1     | Jan-Dec | 12 | 31 | 26°50' | -81°5'   | -0.14 |
| <b>Florida</b>    | Hialeah                | Jan-Dec | 12 | 14 | 25°50' | -80°17'  | 0.28  |
| <b>Georgia</b>    | Calhoun EXP STN        | Apr-Oct | 7  | 10 | 34°29' | -84°58'  | -0.65 |
| <b>Georgia</b>    | U Of GA PLT Science FM | Mar-Nov | 9  | 15 | 33°52' | -83°32'  | -0.41 |
| <b>Georgia</b>    | Experiment             | Apr-Nov | 8  | 14 | 33°16' | -84°17'  | -0.45 |
| <b>Georgia</b>    | Byron EXP STN          | Mar-Nov | 9  | 9  | 32°40' | -83°44'  | -0.77 |
| <b>Georgia</b>    | Tifton EXP STN         | Jan-Dec | 12 | 13 | 31°29' | -83°32'  | 0.13  |
| <b>Georgia</b>    | Savannah WSO AP        | Feb-Nov | 10 | 11 | 32°8'  | -81°12'  | -0.44 |
| <b>Georgia</b>    | Allatoona DAM2         | Apr-Sep | 6  | 5  | 34°10' | -84°44'  | -0.89 |
| <b>Georgia</b>    | Plains SW GA EXP STN   | Apr-Oct | 7  | 4  | 32°3'  | -84°22'  | -0.95 |

|                 |                        |         |   |    |        |          |       |
|-----------------|------------------------|---------|---|----|--------|----------|-------|
| <b>Idaho</b>    | Moscow U Of I          | Apr-Sep | 6 | 31 | 46°44' | -116°58' | -0.12 |
| <b>Idaho</b>    | Arrowrock Dam          | May-Sep | 5 | 10 | 43°36' | -115°55' | 0.00  |
| <b>Idaho</b>    | Parma EXP STN          | May-Sep | 5 | 16 | 43°48' | -116°57' | -0.66 |
| <b>Idaho</b>    | Twin Falls WSO         | Apr-Oct | 7 | 23 | 42°33' | -114°21' | -0.72 |
| <b>Idaho</b>    | Aberdeen EXP STN       | May-Sep | 5 | 27 | 42°57' | -112°50' | -0.61 |
| <b>Idaho</b>    | Rexburg Ricks College  | Jun-Sep | 4 | 5  | 43°49' | -111°47' | -0.74 |
| <b>Idaho</b>    | Lifton Pumping STN     | May-Sep | 5 | 30 | 42°7'  | -111°18' | -0.70 |
| <b>Illinois</b> | Hennepin Power Plant   | May-Sep | 5 | 9  | 41°18' | -89°19'  | -0.41 |
| <b>Illinois</b> | Chicago Botanic Garden | May-Oct | 6 | 16 | 42°8'  | -87°47'  | -0.26 |
| <b>Illinois</b> | De Kalb                | Apr-Oct | 7 | 16 | 41°56' | -88°47'  | 0.08  |
| <b>Illinois</b> | Urbana                 | May-Sep | 5 | 24 | 40°6'  | -88°14'  | -0.37 |
| <b>Illinois</b> | Springfield WSO AP     | Apr-Oct | 7 | 7  | 39°51' | -89°41'  | -0.75 |
| <b>Illinois</b> | Belleville SIU RESE    | May-Sep | 5 | 24 | 38°31' | -89°51'  | -0.02 |
| <b>Illinois</b> | Carlyle RESR           | Jun-Sep | 4 | 12 | 38°38' | -89°22'  | -0.41 |
| <b>Illinois</b> | Dixon Springs AGR C    | May-Oct | 6 | 6  | 37°26' | -88°40'  | -0.48 |
| <b>Indiana</b>  | Wanatah 2 WNW          | Apr-Oct | 7 | 10 | 41°26' | -86°56'  | -0.20 |
| <b>Indiana</b>  | Winamac 2 SSE          | May-Oct | 6 | 9  | 41°1'  | -86°35'  | -0.45 |
| <b>Indiana</b>  | Kewanna 7 NW           | Apr-Oct | 7 | 6  | 41°5'  | -86°31'  | -0.35 |
| <b>Indiana</b>  | Valparaiso Waterworks  | May-Oct | 6 | 16 | 41°31' | -87°2'   | -0.44 |
| <b>Indiana</b>  | W Lafayette 6 NW       | Apr-Oct | 7 | 30 | 40°28' | -87°0'   | -0.41 |
| <b>Indiana</b>  | Oaklondon Geist Resvr  | Apr-Oct | 7 | 14 | 39°54' | -85°59'  | -0.60 |
| <b>Indiana</b>  | Tipton 5 SW            | May-Oct | 6 | 21 | 40°13' | -86°7'   | -0.25 |
| <b>Indiana</b>  | Farmland 5 NNW         | Apr-Oct | 7 | 17 | 40°15' | -85°9'   | -0.38 |

|                  |                        |         |    |    |        |          |       |
|------------------|------------------------|---------|----|----|--------|----------|-------|
| <b>Indiana</b>   | Dubois S Ind Forage FR | May-Oct | 6  | 12 | 38°27' | -86°42'  | -0.18 |
| <b>Indiana</b>   | Evansville WSO AP      | Apr-Oct | 7  | 6  | 38°3'  | -87°32'  | -0.35 |
| <b>Iowa</b>      | Dubuque WSO AP         | May-Sep | 5  | 4  | 42°24' | -90°42'  | -0.82 |
| <b>Iowa</b>      | Castana EXP Farm       | May-Sep | 5  | 23 | 42°4'  | -95°49'  | -0.53 |
| <b>Iowa</b>      | Ames 8 WSW             | Apr-Oct | 7  | 32 | 42°2'  | -93°48'  | -0.55 |
| <b>Iowa</b>      | Iowa City              | Apr-Oct | 7  | 28 | 41°39' | -91°32'  | -0.08 |
| <b>Iowa</b>      | Burlington Radio Kbur  | May-Oct | 6  | 17 | 40°49' | -91°10'  | -0.28 |
| <b>Kansas</b>    | Colby_1SW              | Apr-Sep | 6  | 28 | 39°23' | -101°4'  | -0.87 |
| <b>Kansas</b>    | Glen Elder Lake        | Apr-Oct | 7  | 27 | 39°30' | -98°19'  | -0.58 |
| <b>Kansas</b>    | Tribune 1W             | Apr-Oct | 7  | 30 | 38°28' | -101°46' | -0.62 |
| <b>Kansas</b>    | Hays 1S                | Apr-Sep | 6  | 32 | 38°52' | -99°20'  | -0.54 |
| <b>Kansas</b>    | Marion Lake            | Apr-Oct | 7  | 19 | 38°23' | -97°5'   | -0.80 |
| <b>Kansas</b>    | Garden City EXP STN    | Apr-Oct | 7  | 31 | 37°59' | -100°49' | -0.62 |
| <b>Kansas</b>    | Norton Dam             | Apr-Oct | 7  | 18 | 39°49' | -99°56'  | -0.71 |
| <b>Kansas</b>    | Kirwin Dam             | Apr-Oct | 7  | 23 | 39°40' | -99°7'   | -0.39 |
| <b>Kansas</b>    | Lovewell Dam           | Apr-Oct | 7  | 27 | 39°54' | -98°2'   | -0.07 |
| <b>Kansas</b>    | Webster Dam            | Apr-Oct | 7  | 25 | 39°25' | -99°25'  | -0.48 |
| <b>Kansas</b>    | Elk City Lake          | Apr-Oct | 7  | 11 | 37°17' | -95°48'  | -0.34 |
| <b>Kentucky</b>  | Madisonville           | Apr-Oct | 7  | 17 | 37°21' | -87°31'  | -0.20 |
| <b>Kentucky</b>  | West Paducah 2W        | Apr-Oct | 7  | 7  | 37°4'  | -88°46'  | -0.83 |
| <b>Kentucky</b>  | Jamestown              | Apr-Oct | 7  | 5  | 36°58' | -85°4'   | -0.49 |
| <b>Kentucky</b>  | Nolin River Lake       | Apr-Oct | 7  | 29 | 37°17' | -86°15'  | -0.24 |
| <b>Kentucky</b>  | Dix Dam                | Apr-Sep | 6  | 10 | 37°48' | -84°43'  | -0.58 |
| <b>Kentucky</b>  | Buckhorn Lake          | Apr-Oct | 7  | 9  | 37°21' | -83°23'  | -0.83 |
| <b>Louisiana</b> | Red River RESEARCH STA | Jan-Dec | 12 | 26 | 32°25' | -93°38'  | -0.50 |

|                              |                              |         |    |    |        |         |       |
|------------------------------|------------------------------|---------|----|----|--------|---------|-------|
| <b>Louisiana</b>             | Calhoun Research STA         | Mar-Nov | 9  | 25 | 32°31' | -92°20' | -0.39 |
| <b>Louisiana</b>             | ST Joseph 3 N                | Apr-Oct | 7  | 7  | 31°57' | -91°14' | -0.11 |
| <b>Louisiana</b>             | Toledo Bend Lake             | Jan-Dec | 12 | 4  | 31°12' | -93°34' | -0.85 |
| <b>Louisiana</b>             | LSU Ben HUR Farm             | Jan-Dec | 12 | 19 | 30°22' | -91°10' | -0.43 |
| <b>Louisiana</b>             | Jennings                     | Jan-Dec | 12 | 21 | 30°12' | -92°40' | -0.45 |
| <b>Louisiana</b>             | Houma                        | Jan-Dec | 12 | 20 | 29°35' | -90°44' | -0.57 |
| <b>Maryland&amp;Delaware</b> | Beltsville                   | Apr-Oct | 7  | 29 | 39°2'  | -76°53' | -0.62 |
| <b>Maryland&amp;Delaware</b> | Upper Marlboro 3 NNW         | Apr-Nov | 8  | 20 | 38°52' | -76°47' | -0.20 |
| <b>Maryland&amp;Delaware</b> | Savage River Dam             | May-Sep | 5  | 10 | 39°31' | -79°8'  | 0.01  |
| <b>Maryland&amp;Delaware</b> | Newark Univ Farm             | May-Oct | 6  | 13 | 39°40' | -75°44' | -0.62 |
| <b>Maryland&amp;Delaware</b> | Georgetown 5 SW              | Apr-Sep | 6  | 8  | 38°38' | -75°27' | 0.04  |
| <b>Michigan</b>              | Cornell 5 SE                 | Jun-Sep | 4  | 14 | 45°50' | -87°10' | -0.23 |
| <b>Michigan</b>              | Lake City EXP Farm           | May-Oct | 6  | 30 | 44°19' | -85°12' | -0.34 |
| <b>Michigan</b>              | NW Michigan RSCH FM          | May-Oct | 6  | 14 | 44°53' | -85°41' | -0.28 |
| <b>Michigan</b>              | Lupton 1 S                   | Jun-Oct | 5  | 4  | 44°25' | -84°1'  | -0.78 |
| <b>Michigan</b>              | East Lansing 4 S             | May-Oct | 6  | 19 | 42°40' | -84°29' | -0.51 |
| <b>Michigan</b>              | Dearborn                     | May-Oct | 6  | 22 | 42°19' | -83°14' | -0.55 |
| <b>Minnesota</b>             | Morris WC EXP STN            | May-Sep | 5  | 12 | 45°35' | -95°53' | -0.01 |
| <b>Minnesota</b>             | Univ Of Minn ST Paul         | May-Oct | 6  | 19 | 44°59' | -93°11' | 0.08  |
| <b>Minnesota</b>             | Lamberton SW RSCH & Outreach | May-Oct | 6  | 23 | 44°15' | -95°19' | -0.24 |
| <b>Minnesota</b>             | Waseca EXP STN               | May-Sep | 5  | 26 | 44°4'  | -93°31' | -0.26 |
| <b>Mississippi</b>           | Clarksdale                   | Apr-Oct | 7  | 16 | 34°12' | -90°34' | -0.30 |
| <b>Mississippi</b>           | Holly Springs 4 N            | Apr-Oct | 7  | 28 | 34°49' | -89°26' | -0.45 |

|                    |                        |         |   |    |        |          |       |
|--------------------|------------------------|---------|---|----|--------|----------|-------|
| <b>Mississippi</b> | Pontotoc EXP STN       | Apr-Oct | 7 | 26 | 34°9'  | -89°0'   | -0.28 |
| <b>Mississippi</b> | Rolling Fork           | Mar-Oct | 8 | 28 | 32°54' | -90°53'  | -0.23 |
| <b>Mississippi</b> | State Univ             | Mar-Nov | 9 | 27 | 33°28' | -88°47'  | -0.43 |
| <b>Mississippi</b> | Newton EXP STN         | Mar-Nov | 9 | 29 | 32°20' | -89°5'   | -0.30 |
| <b>Missouri</b>    | New Franklin 1W        | Apr-Sep | 6 | 25 | 39°1'  | -92°46'  | -0.63 |
| <b>Missouri</b>    | Smithville Lake        | Apr-Oct | 7 | 23 | 39°23' | -94°33'  | -0.72 |
| <b>Missouri</b>    | Spickard 7 W           | May-Oct | 6 | 7  | 40°15' | -93°43'  | -0.66 |
| <b>Missouri</b>    | ST Louis Science CTR   | Apr-Sep | 6 | 7  | 38°38' | -90°12'  | -0.51 |
| <b>Missouri</b>    | Lakeside               | Apr-Oct | 7 | 6  | 38°12' | -92°37'  | 0.30  |
| <b>Missouri</b>    | Pomme DE Terre Dam     | May-Oct | 6 | 8  | 37°55' | -93°19'  | -0.45 |
| <b>Missouri</b>    | Mt Vernon M U SW CTR   | May-Sep | 5 | 24 | 37°4'  | -93°53'  | -0.41 |
| <b>Missouri</b>    | Portageville           | Apr-Nov | 8 | 16 | 36°25' | -89°42'  | -0.41 |
| <b>Montana</b>     | Western AG Research CN | Jun-Sep | 4 | 12 | 46°20' | -114°5'  | -0.83 |
| <b>Montana</b>     | Bozeman 6 W EXP Farm   | Map-Sep | 5 | 18 | 45°40' | -111°9'  | -0.41 |
| <b>Montana</b>     | Moccasin EXP STN       | May-Sep | 5 | 30 | 47°3'  | -109°57' | -0.62 |
| <b>Montana</b>     | Huntley EXP STN        | Apr-Sep | 6 | 29 | 45°55' | -108°15' | -0.47 |
| <b>Montana</b>     | Sidney                 | May-Sep | 5 | 29 | 47°44' | -104°9'  | -0.28 |
| <b>Nebraska</b>    | Mitchell 5 E           | Apr-Sep | 6 | 8  | 41°57' | -103°41' | -0.56 |
| <b>Nebraska</b>    | Valentine Lks Game Ref | May-Sep | 5 | 16 | 42°35' | -100°41' | -0.40 |
| <b>Nebraska</b>    | Northeast NE EXP STN   | May-Sep | 5 | 12 | 42°23' | -96°57'  | -0.51 |
| <b>Nebraska</b>    | Omaha (north) Wsfo     | May-Oct | 6 | 10 | 41°22' | -96°1'   | -0.68 |
| <b>Nebraska</b>    | Enders Lake            | Apr-Oct | 7 | 15 | 40°25' | -101°31' | -0.76 |
| <b>Nebraska</b>    | Medicine Creek DAM     | Apr-Oct | 7 | 23 | 40°23' | -100°13' | -0.60 |
| <b>Nevada</b>      | Fallon EXP STN         | Apr-Oct | 7 | 17 | 39°27' | -118°47' | -0.05 |

|                    |                        |         |    |    |        |          |       |
|--------------------|------------------------|---------|----|----|--------|----------|-------|
| <b>Nevada</b>      | Rye Patch DAM          | May-Oct | 6  | 14 | 40°28' | -118°18' | -0.77 |
| <b>Nevada</b>      | Beowawe U Of N Ranch   | May-Sep | 5  | 9  | 39°54' | -116°35' | 0.06  |
| <b>Nevada</b>      | Ruby Lake              | Apr-Oct | 7  | 21 | 40°12' | -115°30' | -0.60 |
| <b>Nevada</b>      | Silverpeak             | May-Sep | 5  | 26 | 37°40' | -117°35' | -0.26 |
| <b>Nevada</b>      | Boulder City           | Jan-Dec | 12 | 16 | 35°59' | -114°51' | -0.28 |
| <b>New England</b> | Norfolk 2 SW           | May-Oct | 6  | 24 | 41°58' | -73°13'  | -0.68 |
| <b>New England</b> | Coventry               | May-Oct | 6  | 5  | 41°48' | -72°21'  | -0.73 |
| <b>New England</b> | Caribou WSO AP         | Jun-Sep | 4  | 27 | 46°52' | -68°2'   | -0.62 |
| <b>New England</b> | Rangeley 2 NW          | May-Sep | 5  | 17 | 44°59' | -70°40'  | -0.29 |
| <b>New England</b> | Groveland              | May-Oct | 6  | 15 | 42°45' | -71°3'   | -0.39 |
| <b>New England</b> | Lakeport 2             | May-Sep | 5  | 20 | 43°33' | -71°28'  | -0.44 |
| <b>New England</b> | Massabesic Lake        | Jun-Oct | 5  | 15 | 42°59' | -71°24'  | 0.14  |
| <b>New England</b> | Kingston               | May-Oct | 6  | 32 | 41°29' | -71°32'  | -0.31 |
| <b>New England</b> | Essex Junction1 N      | Apr-Oct | 7  | 23 | 44°31' | -73°7'   | -0.54 |
| <b>New Jersey</b>  | Canoe Brook            | May-Sep | 5  | 16 | 40°45' | -74°21'  | -0.15 |
| <b>New Jersey</b>  | New Brunswick 3 SE     | May-Oct | 6  | 28 | 40°28' | -74°26'  | -0.31 |
| <b>New Mexico</b>  | Farmington AG SCI CNTR | Apr-Oct | 7  | 26 | 36°42' | -108°15' | -0.55 |
| <b>New Mexico</b>  | Cochiti DAM            | Apr-Oct | 7  | 25 | 35°38' | -106°19' | -0.46 |
| <b>New Mexico</b>  | Reserve Ranger STN     | May-Sep | 5  | 9  | 33°43' | -108°47' | -0.82 |
| <b>New Mexico</b>  | Elephant Butte Dam     | Jan-Dec | 12 | 24 | 33°9'  | -107°11' | -0.62 |
| <b>New Mexico</b>  | Bitter Lks WR          | Apr-Oct | 7  | 13 | 33°29' | -104°24' | -0.73 |
| <b>New Mexico</b>  | Caballo Dam            | Jan-Dec | 12 | 23 | 32°54' | -107°18' | -0.33 |
| <b>New York</b>    | Lansing Manor          | May-Sep | 5  | 12 | 42°27' | -74°28'  | 0.00  |
| <b>New York</b>    | Canton 4 SE            | May-Sep | 5  | 13 | 44°34' | -75°7'   | -0.06 |

|                       |                        |         |   |    |        |          |       |
|-----------------------|------------------------|---------|---|----|--------|----------|-------|
| <b>New York</b>       | Geneva RSCH Farm       | May-Oct | 6 | 30 | 42°53' | -77°2'   | -0.45 |
| <b>New York</b>       | Ithaca Cornell Univ    | May-Oct | 6 | 24 | 42°27' | -76°27'  | -0.51 |
| <b>North Carolina</b> | Chapel Hill 2 W        | Apr-Oct | 7 | 22 | 35°55' | -79°6'   | -0.47 |
| <b>North Carolina</b> | Hofmann Forest         | Mar-Nov | 9 | 12 | 34°50' | -77°18'  | 0.43  |
| <b>North Carolina</b> | Aurora 6 N             | Mar-Nov | 9 | 22 | 35°23' | -76°47'  | -0.34 |
| <b>North Dakota</b>   | Minot EXP STN          | Jun-Sep | 3 | 16 | 48°11' | -101°18' | -0.28 |
| <b>North Dakota</b>   | Williston EXP Farm     | May-Sep | 5 | 31 | 48°8'  | -103°45' | -0.61 |
| <b>North Dakota</b>   | Langdon EXP Farm       | Jun-Sep | 4 | 27 | 48°45' | -98°20'  | -0.40 |
| <b>North Dakota</b>   | Dickinson EXP STN      | May-Sep | 5 | 17 | 46°53' | -102°48' | -0.52 |
| <b>North Dakota</b>   | Mandan EXperiment STN  | Apr-Sep | 6 | 16 | 46°48' | -100°54' | -0.82 |
| <b>Ohio</b>           | Hoytville 2 NE         | Apr-Oct | 7 | 20 | 41°13' | -83°46'  | -0.69 |
| <b>Ohio</b>           | Coshocton AG RSCH STN  | Apr-Sep | 6 | 26 | 40°22' | -81°48'  | -0.29 |
| <b>Ohio</b>           | Wooster EXP STN        | May-Oct | 6 | 27 | 40°47' | -81°55'  | -0.09 |
| <b>Oklahoma</b>       | Chickasha EXP STN      | Apr-Oct | 7 | 28 | 35°3'  | -97°55'  | -0.42 |
| <b>Oklahoma</b>       | Stillwater 2 W         | May-Oct | 5 | 12 | 36°7'  | -97°6'   | -0.46 |
| <b>Oklahoma</b>       | Altus DAM              | Apr-Oct | 7 | 31 | 34°53' | -99°18'  | -0.51 |
| <b>Oklahoma</b>       | Mcgee Creek DAM        | Apr-Oct | 7 | 26 | 34°19' | -95°52'  | -0.66 |
| <b>Oregon</b>         | Corvallis State Univ   | Apr-Oct | 7 | 31 | 44°38' | -123°11' | -0.52 |
| <b>Oregon</b>         | Summer Lake 1 S        | May-Oct | 6 | 32 | 42°58' | -120°47' | -0.44 |
| <b>Oregon</b>         | Moro                   | Apr-Oct | 7 | 30 | 45°29' | -120°43' | -0.51 |
| <b>Oregon</b>         | Pendleton Br EXP STN   | Mar-Oct | 8 | 23 | 45°43' | -118°38' | -0.36 |
| <b>Oregon</b>         | Bend 7 NE              | May-Sep | 5 | 22 | 44°7'  | -121°13' | -0.52 |
| <b>Oregon</b>         | Malheur Branch EXP STN | Apr-Oct | 7 | 25 | 43°59' | -117°1'  | -0.68 |
| <b>Pennsylvania</b>   | Francis E Walter DAM   | May-Oct | 6 | 23 | 41°7'  | -75°44'  | -0.47 |



|                       |                          |         |    |    |        |          |       |
|-----------------------|--------------------------|---------|----|----|--------|----------|-------|
| <b>Pennsylvania</b>   | Landisville 2 NW         | May-Oct | 6  | 24 | 40°7'  | -76°26'  | -0.56 |
| <b>Pennsylvania</b>   | Confluence 1 SW DAM      | Apr-Oct | 7  | 18 | 39°48' | -79°22'  | -0.41 |
| <b>Pennsylvania</b>   | Ford City 4 S DAM        | May-Sep | 5  | 15 | 40°43' | -79°30'  | -0.37 |
| <b>South Carolina</b> | Chesnee 7 WSW            | Apr-Oct | 7  | 20 | 35°8'  | -81°58'  | -0.09 |
| <b>South Carolina</b> | Clemson Univ             | Jan-Dec | 12 | 27 | 34°40' | -82°49'  | -0.60 |
| <b>South Carolina</b> | Florence 8 NE            | Jan-Dec | 12 | 18 | 34°18' | -79°44'  | -0.35 |
| <b>South Carolina</b> | Sandhill Rsch Elgi       | Jan-Dec | 12 | 9  | 34°9'  | -80°52'  | -0.53 |
| <b>South Carolina</b> | Barnwell 5 ENE           | Jan-Dec | 12 | 7  | 33°15' | -81°15'  | -0.61 |
| <b>South Carolina</b> | Blackville 3 W           | Feb-Dec | 11 | 16 | 33°22' | -81°20'  | -0.40 |
| <b>South Carolina</b> | Charleston WSO AP        | Mar-Nov | 9  | 12 | 32°54' | -80°2'   | 0.17  |
| <b>South Carolina</b> | Ridgeville               | Jul-Nov | 5  | 8  | 33°6'  | -80°18'  | -0.28 |
| <b>South Dakota</b>   | Pactola Dam              | Jun-Sep | 4  | 29 | 44°4'  | -103°29' | -0.54 |
| <b>South Dakota</b>   | Oral                     | May-Sep | 5  | 21 | 43°24' | -103°16' | -0.71 |
| <b>South Dakota</b>   | Brookings 2 NE           | May-Sep | 5  | 29 | 44°19' | -96°46'  | -0.08 |
| <b>South Dakota</b>   | Pickstown                | May-Oct | 6  | 27 | 43°4'  | -98°32'  | -0.38 |
| <b>Tennessee</b>      | Greeneville Exp STN      | Apr-Oct | 7  | 28 | 36°6'  | -82°51'  | -0.34 |
| <b>Tennessee</b>      | Knoxville EXP STN        | Apr-Oct | 7  | 28 | 35°53' | -83°57'  | -0.51 |
| <b>Tennessee</b>      | Crossville ED & Research | Apr-Oct | 7  | 31 | 36°1'  | -85°8'   | -0.35 |
| <b>Tennessee</b>      | Lewisburg Exp STN        | Apr-Sep | 6  | 12 | 35°25' | -86°49'  | -0.56 |
| <b>Tennessee</b>      | Neapolis Res & Edu STN   | Apr-Sep | 6  | 29 | 35°43' | -86°58'  | -0.62 |
| <b>Tennessee</b>      | Springfield Exp STN      | Apr-Oct | 7  | 25 | 36°28' | -86°50'  | -0.36 |
| <b>Tennessee</b>      | Ames Plantation          | Apr-Oct | 7  | 17 | 35°7'  | -89°13'  | -0.74 |
| <b>Tennessee</b>      | Jackson Exp Stn          | Apr-Oct | 7  | 32 | 35°37' | -88°51'  | 0.13  |
| <b>Tennessee</b>      | Martin U Of T Branch E   | Apr-Oct | 7  | 13 | 36°21' | -88°52'  | -0.67 |
| <b>Tennessee</b>      | Memphis WFO              | Apr-Oct | 7  | 27 | 35°8'  | -89°48'  | -0.46 |

|                   |                       |         |    |    |        |          |       |
|-------------------|-----------------------|---------|----|----|--------|----------|-------|
| <b>Tennessee</b>  | Milan EXP Stn         | Apr-Oct | 7  | 21 | 35°56' | -88°44'  | -0.20 |
| <b>Texas</b>      | Sanford Dam           | Apr-Sep | 6  | 7  | 35°42' | -101°33' | -0.80 |
| <b>Texas</b>      | Lake Alan Henry       | Mar-Nov | 9  | 6  | 33°4'  | -101°3'  | -0.95 |
| <b>Texas</b>      | Grapevine Dam         | Mar-Nov | 9  | 28 | 32°57' | -97°3'   | -0.56 |
| <b>Texas</b>      | Lake Tawakoni         | Jan-Dec | 12 | 9  | 32°51' | -95°53'  | -0.34 |
| <b>Texas</b>      | Canyon Dam            | Jan-Dec | 12 | 25 | 29°52' | -98°12'  | -0.63 |
| <b>Texas</b>      | Beaumont RSCH CTR     | Jan-Dec | 12 | 29 | 30°4'  | -94°18'  | -0.27 |
| <b>Texas</b>      | Choke Canyon Dam      | Jan-Dec | 12 | 32 | 28°28' | -98°15'  | -0.72 |
| <b>Texas</b>      | Falcon Dam            | Jan-Dec | 12 | 12 | 26°33' | -99°8'   | -0.66 |
| <b>Utah</b>       | Bear River Bay        | Apr-Sep | 6  | 8  | 41°18' | -112°16' | -0.91 |
| <b>Utah</b>       | Logan 5 SW Exp Farm   | Apr-Oct | 7  | 20 | 41°40' | -111°54' | -0.65 |
| <b>Utah</b>       | Provo Byu             | Apr-Oct | 7  | 29 | 40°15' | -111°39' | -0.56 |
| <b>Utah</b>       | Utah Lake Lehi        | May-Sep | 5  | 13 | 40°22' | -111°54' | 0.06  |
| <b>Utah</b>       | Flaming Gorge         | May-Sep | 5  | 13 | 40°56' | -109°25' | -0.62 |
| <b>Utah</b>       | FT Duchesne           | May-Sep | 5  | 12 | 40°17' | -109°52' | 0.11  |
| <b>Utah</b>       | Arches NP Hqs         | May-Sep | 5  | 16 | 38°37' | -109°37' | -0.70 |
| <b>Utah</b>       | Green River Aviation  | Apr-Oct | 7  | 11 | 39°0'  | -110°10' | -0.30 |
| <b>Utah</b>       | Mexican Hat           | May-Oct | 6  | 16 | 37°9'  | -109°52' | -0.13 |
| <b>Virginia</b>   | Holland 1 E           | Apr-Oct | 7  | 15 | 36°41' | -76°47'  | -0.68 |
| <b>Virginia</b>   | John H Kerr Dam       | May-Oct | 6  | 25 | 36°36' | -78°17'  | -0.46 |
| <b>Virginia</b>   | Philpott Dam 2        | Apr-Oct | 7  | 18 | 36°47' | -80°2'   | -0.12 |
| <b>Virginia</b>   | Piedmont Research STN | Apr-Oct | 7  | 28 | 38°13' | -78°7'   | -0.47 |
| <b>Virginia</b>   | Gathright Dam         | May-Oct | 6  | 13 | 37°57' | -79°57'  | -0.38 |
| <b>Washington</b> | Puyallup 2 W Exp STN  | May-Sep | 5  | 9  | 47°12' | -122°20' | -0.45 |
| <b>Washington</b> | Connell 1 W           | Apr-Sep | 6  | 10 | 46°40' | -118°53' | -0.74 |

|                      |                        |         |   |    |        |          |       |
|----------------------|------------------------|---------|---|----|--------|----------|-------|
| <b>Washington</b>    | Eltopia 8 WSW          | May-Oct | 6 | 22 | 46°24' | -119°10' | -0.42 |
| <b>Washington</b>    | Lind 3 NE              | Apr-Sep | 6 | 32 | 47°0'  | -118°35' | -0.71 |
| <b>Washington</b>    | Wenatchee Exp Station  | Apr-Sep | 6 | 10 | 47°26' | -120°21' | -0.42 |
| <b>Washington</b>    | Whitman Mission        | Apr-Sep | 6 | 29 | 46°3'  | -118°27' | -0.54 |
| <b>Washington</b>    | Yakima WSO AP          | Apr-Sep | 6 | 14 | 46°34' | -120°32' | -0.11 |
| <b>Washington</b>    | Spokane WSO AP         | Apr-Sep | 6 | 12 | 47°38' | -117°32' | -0.52 |
| <b>Washington</b>    | Bellingham 3 SSW       | May-Oct | 6 | 29 | 48°43' | -122°31' | -0.35 |
| <b>Washington</b>    | Spokane WFO            | Apr-Sep | 6 | 19 | 47°41' | -117°38' | -0.69 |
| <b>Washington</b>    | Selah 2 NE             | Apr-Sep | 6 | 15 | 46°40' | -120°30' | -0.47 |
| <b>Washington</b>    | Fort Lewis Golf Course | May-Sep | 5 | 6  | 47°5'  | -122°40' | -0.61 |
| <b>West Virginia</b> | Coopers Rock St Forest | Jun-Sep | 4 | 7  | 39°41' | -79°47'  | -0.05 |
| <b>West Virginia</b> | Parsons 1 SE           | May-Oct | 6 | 5  | 39°6'  | -79°40'  | -0.79 |
| <b>West Virginia</b> | Bluestone Lake         | Apr-Oct | 7 | 6  | 37°39' | -80°53'  | -0.32 |
| <b>West Virginia</b> | Kearneysville WSO      | Apr-Sep | 6 | 10 | 39°23' | -77°53'  | -0.34 |
| <b>Wisconsin</b>     | Rainbow Reservoir      | Jun-Sep | 4 | 13 | 45°50' | -89°33'  | -0.02 |
| <b>Wisconsin</b>     | Trempealeau Dam 6      | May-Sep | 5 | 11 | 44°0'  | -91°26'  | -0.21 |
| <b>Wisconsin</b>     | Marshfield Exp Farm    | Jun-Sep | 4 | 28 | 44°39' | -90°8'   | -0.02 |
| <b>Wisconsin</b>     | Arlington Univ Farm    | Jun-Sep | 4 | 24 | 43°18' | -89°21'  | -0.37 |
| <b>Wyoming</b>       | Green River            | Jun-Sep | 4 | 11 | 41°32' | -109°28' | -0.64 |
| <b>Wyoming</b>       | Heart Mountain         | May-Sep | 5 | 24 | 44°42' | -108°57' | -0.42 |
| <b>Wyoming</b>       | Sheridan Field Stn     | May-Sep | 5 | 22 | 44°50' | -106°50' | -0.55 |
| <b>Wyoming</b>       | Whalen Dam             | Apr-Sep | 6 | 8  | 42°15' | -104°38' | -0.53 |
| <b>Wyoming</b>       | Pathfinder Dam         | Apr-Sep | 6 | 8  | 42°28' | -106°51' | -0.49 |
